# Supplementary material for: Contact zone of slow worms Anguis fragilis Linnaeus, 1758 and Anguis colchica (Nordmann, 1840) in Poland
Source: PeerJ. 2025 Jan 6;13:e18563. doi: 10.7717/peerj.18563 (PMC11716018; doi:10.7717/peerj.18563)
Supplement: Supplemental Information 5 — Characters codding as in Table S1A [file peerj-13-18563-s005.docx]

| **Characters** | **Value** | **Image** |
| --- | --- | --- |
| Dorsal spot polymorphism  (DP) | DP1 – presence of blue spots  (Kaczmarek, 2015) | **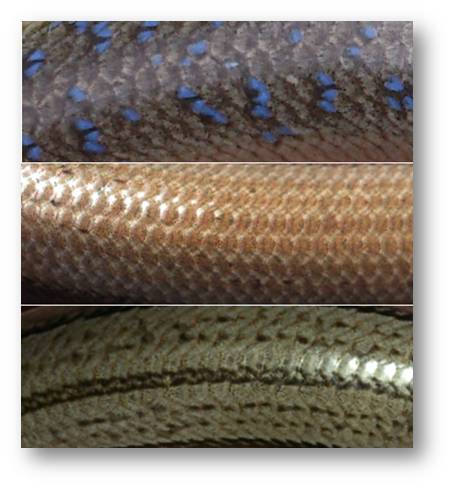** |
| DP2 – presence of green spots  (Kaczmarek, 2015) | 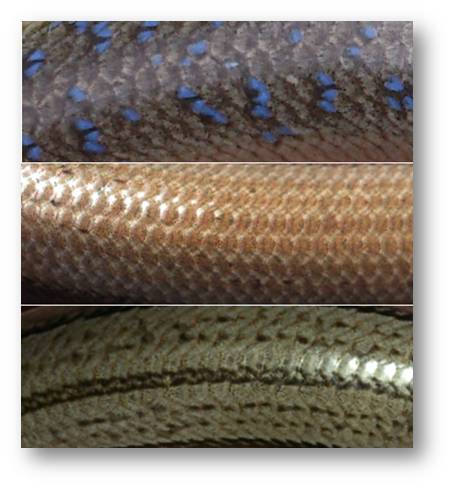 |
| DP3 - no dorsal spots | 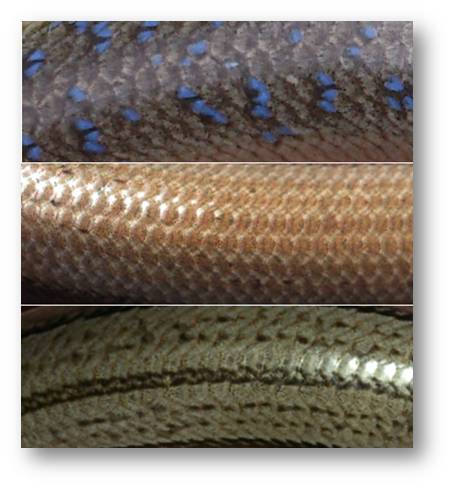 |
| DP4 – 4 lines of spots so called „pattern”  (Kaczmarek, 2015) | 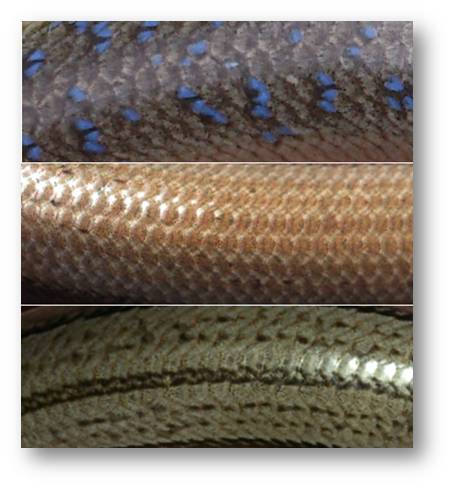 |
| Dorsal line (CL) and dorsa/lateral border (CT) | CL1 – No dorsal line  CT1 – lacking of dorsa/lateral border,  (Kaczmarek, 2015) | 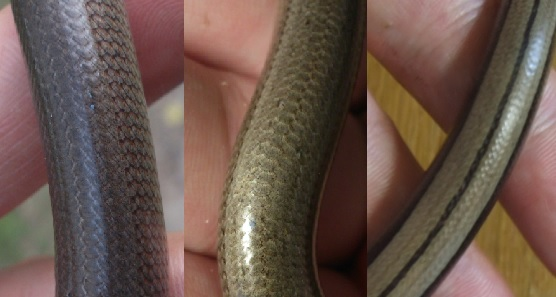 |
| CL2 – Vanishing dorsal line  CT2 – intermediate state of dorsa/lateral border,  (Kaczmarek, 2015) | 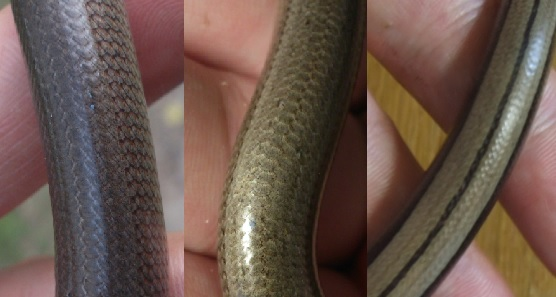 |
| CL3 – presence of dorsal line  CT3 – strong dorsa/lateral border,  (Kaczmarek, 2015) | 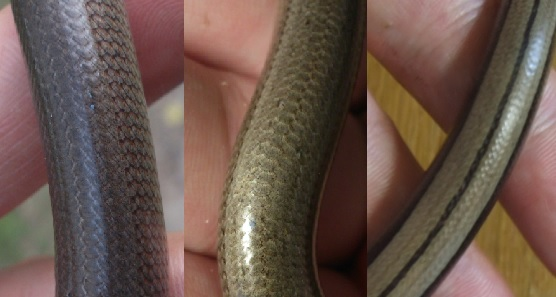 |
| Abdominal coloration (CV) | CV1 – Black coloration of ventral part of body  (Kaczmarek, 2015) | 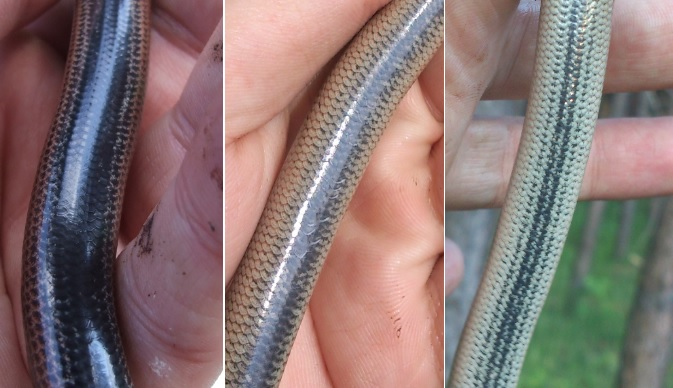 |
| CV2 – intermediate state of ventral part of body  (Kaczmarek, 2015) | 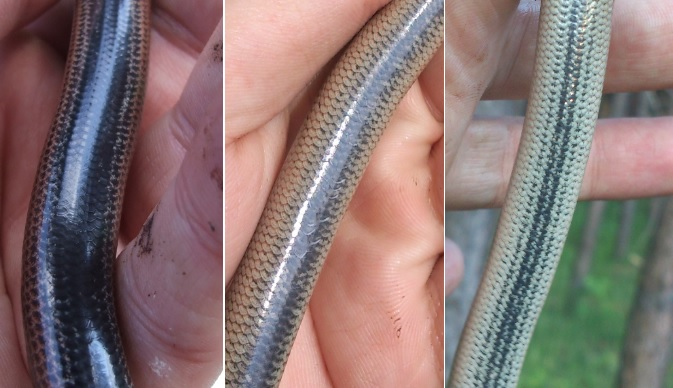 |
| CV3 – light state of ventral part of body  (Kaczmarek, 2015) | 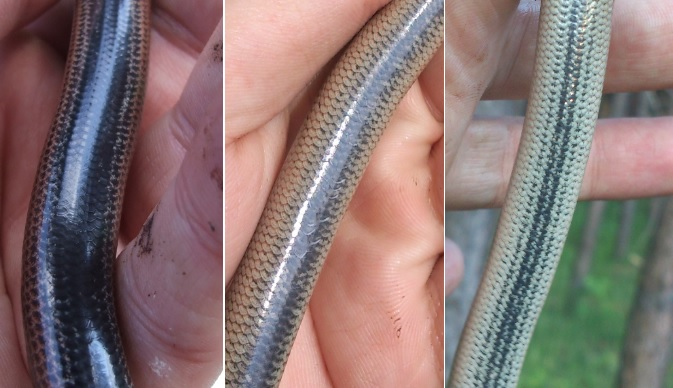 |
| CV4 – Different coloration of ventral part of body (eg. blue) (Kaczmarek et al., 2016) | 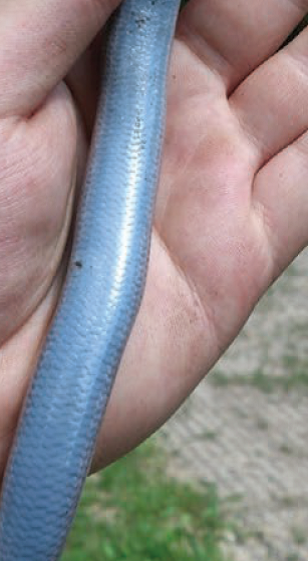 |
| Spots after head (HP) | HP1 – no brown spots after head  (Kaczmarek, 2015) | 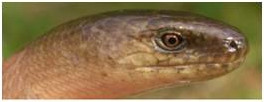 |
| HP2 – Brown spots presence after head.  HP3 – Spots after head with other color (no image).  (Kaczmarek, 2015) | 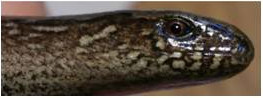 |
| Ear opening (EO) | EO1 – Ear opening clearly visible on both side  EO1* - Ear opening clearly visible on one side  (Skórzewski, 2017) | 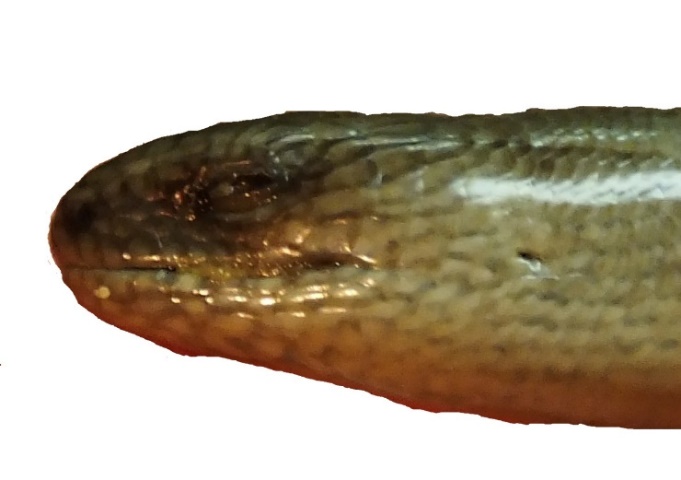 |
| EO2 – no visible ear opening  (Skórzewski, 2017) | 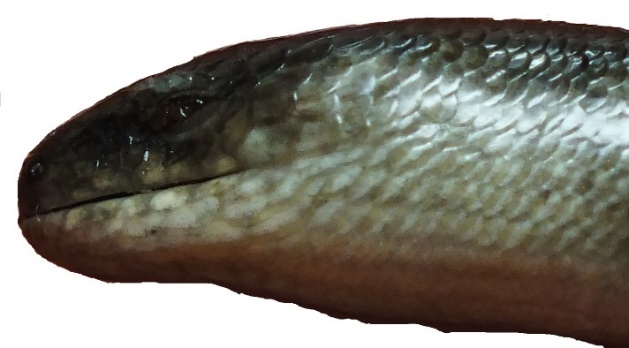 |
| EO3 – Shallow on one or both side of head,  (Skórzewski, 2017) | 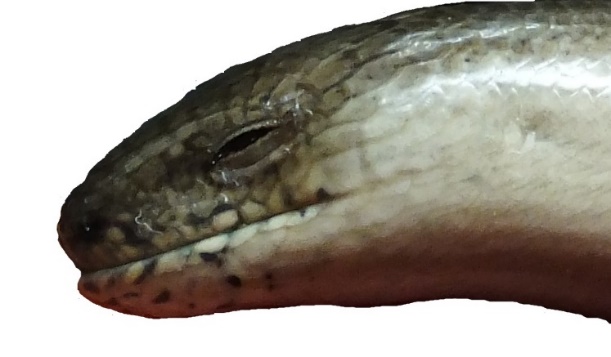 |
