# Supplementary material for: Contact zone of slow worms Anguis fragilis Linnaeus, 1758 and Anguis colchica (Nordmann, 1840) in Poland
Source: PeerJ. 2025 Jan 6;13:e18563. doi: 10.7717/peerj.18563 (PMC11716018; doi:10.7717/peerj.18563)
Supplement: Supplemental Information 11 — Population number as in Table 1; ND2/RAG1 identification: F - A. fragilis; C - A. colchica, ? - unclear species assignment. [file peerj-13-18563-s011.xlsx]

## Sheet: Arkusz1
Population ID	Code/Museum Signature	Species	Sex	Molecular analyses	ND2 Genotype	RAG1 Genotype	Morphological analyses
1	MNHW-Reptilia-0280	Anguis fragilis	M	NO	-	-	YES
2	MNHW-Reptilia-0330	Anguis fragilis	M	NO	-	-	YES
3	By2016_1	Anguis fragilis	M	YES	F	F	YES
3	By2016_2	Anguis fragilis	M	YES	F	F	YES
3	By2016_3	Anguis fragilis	M	NO	-	-	YES
3	By2016_4	Anguis fragilis	M	NO	-	-	YES
4	GO2016_1	Anguis fragilis	M	YES	F	-	YES
5	I2017_1	Anguis fragilis	M	YES	F	-	YES
5	I2017_3	Anguis fragilis	M	YES	F	F	NO
5	I2017_2	Anguis fragilis	M	YES	F	F	YES
6	J2016_1	Anguis fragilis	M	YES	F	F	YES
7	KG2015_4	Anguis fragilis	F	YES	F	F	YES
7	KG2015_5	Anguis fragilis	F	YES	F	F	YES
7	KG2015_6	Anguis fragilis	F	YES	F	F	YES
7	KG2015_1	Anguis fragilis	M	YES	F	F	YES
7	KG2015_2	Anguis fragilis	M	YES	F	F	YES
7	KG2015_3	Anguis fragilis	?	YES	F	F	NO
8	PT2016_1	Anguis fragilis	M	NO	-	-	YES
8	PT2016_2	Anguis fragilis	F	NO	-	-	YES
8	PT2016_3	Anguis fragilis	F	NO	-	-	YES
9	PS2014_1	Anguis fragilis	F	YES	F	-	YES
9	PS2016_1 / MNHW-Reptilia-0316	Anguis fragilis	M	YES	F	F	YES
9	PS2016_2 / MNHW-Reptilia-0316	Anguis fragilis	F	YES	F	F	YES
9	PS2016_3 / MNHW-Reptilia-0316	Anguis fragilis	F	YES	F	F	YES
9	PS2017_1 / MNHW-Reptilia-0317	Anguis fragilis	M	YES	F	F	YES
9	PS2017_2 / MNHW-Reptilia-0317	Anguis fragilis	F	YES	F	F	YES
9	MNHW-Reptilia-0318	Anguis fragilis	F	NO	-	-	YES
10	DB2014_1	Anguis fragilis	M	YES	F	-	YES
10	DB2016_1	Anguis fragilis	M	YES	F	F	YES
10	DB2017_1	Anguis fragilis	M	YES	F	-	YES
10	DB2017_2	Anguis fragilis	F	NO	-	-	YES
10	MNHW-Reptilia-0335	Anguis fragilis	F	NO	-	-	YES
10	MNHW-Reptilia-0334	Anguis fragilis	M	NO	-	-	YES
10	MNHW-Reptilia-0333	Anguis fragilis	M	NO	-	-	YES
11	S2015_4	Anguis fragilis	M	YES	F	F	YES
11	S2015_3	Anguis fragilis	M	YES	-	F	YES
11	S2015_5	Anguis fragilis	M	YES	F	F	YES
11	S2015_2	Anguis fragilis	F	YES	F	F	YES
11	S2015_1	Anguis fragilis	-	YES	F	F	NO
11	MNHW-Reptilia-0310-1	Anguis fragilis	M	NO	-	-	YES
11	MNHW-Reptilia-0310-2	Anguis fragilis	M	NO	-	-	YES
11	MNHW-Reptilia-0310-3	Anguis fragilis	M	NO	-	-	YES
12	U2016_1	Anguis fragilis	M	YES	F	F	NO
13	W2015_1	Anguis fragilis	M	YES	F	F	YES
13	W2015_2	Anguis fragilis	F	YES	F	F	YES
13	W2015_3	Anguis fragilis	M	NO	-	-	YES
13	W2016_1	Anguis fragilis	F	YES	F	F	YES
13	W2016_2	Anguis fragilis	F	YES	F	F	YES
13	MNHW-Reptilia-0248_3	Anguis fragilis	F	NO	-	-	YES
13	MNHW-Reptilia-0248_1	Anguis fragilis	M	NO	-	-	YES
13	MNHW-Reptilia-0248_2	Anguis fragilis	M	NO	-	-	YES
14	WK2015_1	Anguis fragilis	M	NO	-	-	YES
15	KL2015_1	Anguis colchica incerta	F	YES	C	C	YES
15	KL2017_1	Anguis colchica incerta	M	NO	-	-	YES
15	KL2017_2	Anguis colchica incerta	M	NO	-	-	YES
16	KY2015_1	Anguis colchica incerta	M	YES	C	C	YES
17	Lu2015_3	Anguis colchica incerta	F	YES	C	C	YES
17	Lu2015_4	Anguis colchica incerta	M	YES	C	C	YES
17	Lu2015_5	Anguis colchica incerta	M	YES	C	C	YES
17	Lu2015_1	Anguis colchica incerta	M	YES	C	C	YES
17	Lu2015_2	Anguis colchica incerta	M	YES	C	C	YES
17	Lu2017_1	Anguis colchica incerta	F	YES	C	C	YES
17	Lu2017_2	Anguis colchica incerta	F	YES	C	C	YES
17	Lu2017_3	Anguis colchica incerta	F	YES	C	C	YES
18	M2016_1	Anguis colchica incerta	M	YES	C	C	YES
18	BO2017_1	Anguis colchica incerta	F	NO	-	-	YES
18	M2017_1	Anguis colchica incerta	M	NO	-	-	YES
19	BL2017_1	Anguis colchica incerta	M	YES	C	C	YES
20	RYC2017_1	Anguis colchica incerta	M	NO	-	-	YES
20	RYC2017_2	Anguis colchica incerta	F	NO	-	-	YES
21	RZ2017_1	Anguis colchica incerta	F	YES	C	C	YES
21	CZ2017_1	Anguis colchica incerta	M	NO	-	-	YES
21	CZ2019_2	Anguis colchica incerta	M	NO	-	-	YES
22	MNHW-Reptilia-247_1	Anguis colchica incerta	M	NO	-	-	YES
22	MNHW-Reptilia-247_2	Anguis colchica incerta	M	NO	-	-	YES
22	MNHW-Reptilia-247_7	Anguis colchica incerta	F	NO	-	-	YES
22	MNHW-Reptilia-247_3	Anguis colchica incerta	F	NO	-	-	YES
22	MNHW-Reptilia-247_4	Anguis colchica incerta	F	NO	-	-	YES
22	MNHW-Reptilia-247_5	Anguis colchica incerta	F	NO	-	-	YES
22	MNHW-Reptilia-247_6	Anguis colchica incerta	F	NO	-	-	YES
23	UJ2017_2	Anguis colchica incerta	F	NO	-	-	YES
23	UJ2017_1	Anguis colchica incerta	M	NO	-	-	YES
24	U2018_1	Anguis colchica incerta	F	NO	-	-	YES
24	AC 73505	Anguis colchica incerta	F	NO	-	-	YES
25	AC 73506	Anguis colchica incerta	M	NO	-	-	YES
26	Ba2015_2	Anguis fragilis	F	YES	F	F	YES
26	Ba2015_4	Grey zone specimen	F	NO	-	-	YES
26	Ba2015_1	Grey zone specimen	M	NO	-	-	YES
26	Ba2015_3	Grey zone specimen	F	YES	F	-	YES
26	Ba2015_5	Grey zone specimen	M	NO	-	-	YES
27	C2017_1	Hybrid	M	YES	C	?	YES
27	C2017_2	Hybrid	M	YES	C	?	YES
27	C2017_3	Hybrid	M	YES	C	?	YES
27	C2017_4	Anguis colchica incerta	F	YES	C	C	YES
28	G2016_2	Grey zone specimen	M	YES	F	-	YES
28	G2016_1	Grey zone specimen	M	YES	F	-	YES
28	G2016_2	Anguis fragilis	M	YES	F	F	YES
28	G2016_3	Anguis fragilis	?	YES	F	F	NO
29	KK2016_1	Grey zone specimen	M	YES	-	F	YES
29	KK2016_2	Anguis fragilis	M	YES	F	F	YES
29	KK2016_3	Grey zone specimen	?	YES	-	F	NO
29	KK2017_1	Hybrid	F	YES	C	F	YES
30	KR2017_1	Anguis colchica incerta	F	YES	C	C	YES
30	KR2017_2	Anguis colchica incerta	F	YES	C	C	YES
30	KR2017_3	Anguis colchica incerta	M	YES	C	C	YES
30	KR2017_4	Anguis colchica incerta	F	YES	C	C	YES
30	KR2017_5	Anguis colchica incerta	F	YES	C	C	YES
30	KR2017_7	Grey zone specimen	?	YES	C	-	NO
30	KR2017_6	Anguis colchica incerta	M	YES	C	C	YES
31	Lb2016_1	Anguis fragilis	?	YES	F	F	NO
31	Lb2016_2	Grey zone specimen	M	YES	F	-	YES
31	Lb2016_3	Grey zone specimen	M	YES	F	-	YES
31	Lb2016_4	Anguis fragilis	M	YES	F	F	YES
31	Lb2016_5	Anguis fragilis	F	YES	F	F	YES
31	Lb2016_6	Grey zone specimen	F	YES	F	-	YES
32	AF 73628	Grey zone specimen	M	NO	-	-	YES
33	N2015_1	Anguis fragilis	M	YES	F	F	YES
33	N2015_2	Grey zone specimen	M	YES	F	-	YES
33	N2015_6	Anguis fragilis	M	YES	F	F	YES
33	N2015_4	Anguis fragilis	M	YES	F	F	YES
33	N2015_7	Anguis fragilis	M	YES	F	F	YES
33	N2015_5	Anguis fragilis	M	YES	F	F	YES
33	N2015_3	Anguis fragilis	M	YES	F	F	YES
34	PL2015_2	Anguis fragilis	F	YES	F	F	YES
34	PL2015_3	Anguis fragilis	M	YES	F	F	YES
34	AF 73520	Grey zone specimen	F	NO	-	-	YES
34	PL2015_1	Anguis fragilis	?	YES	F	F	NO
34	PL2015_4	Grey zone specimen	?	YES	F	-	NO
35	PZ2017_1	Grey zone specimen	F	YES	F	-	YES
36	OL2016	Grey zone specimen	?	YES	F	-	NO
37	RY2017_1	Anguis colchica incerta	F	YES	C	C	YES
38	CH2016	Anguis fragilis	?	YES	F	F	NO
39	ST2016_1	Anguis colchica incerta	M	YES	C	C	YES
40	TG2017_1	Hybrid	M	YES	C	F	YES
40	TG2017_2	Grey zone specimen	?	YES	F	-	NO
41	TO2016	Grey zone specimen	?	YES	F	-	NO
42	TU2014_1	Grey zone specimen	M	YES	F	-	YES
43	NMP-P6V 75362-3	Anguis colchica orientalis	F	NO	-	-	YES
43	NMP-P6V 75362-2	Anguis colchica orientalis	F	NO	-	-	YES
43	NMP-P6V 75362-1	Anguis colchica orientalis	M	NO	-	-	YES
44	NMP-P6V 35082	Anguis fragilis	M	NO	-	-	YES
44	NMP-P6V 34009/3	Anguis fragilis	F	NO	-	-	YES
44	NMP-P6V 34009/1	Anguis fragilis	F	NO	-	-	YES
44	NMP-P6V 34009/2	Anguis fragilis	M	NO	-	-	YES
45	NMP-P6V 35097	Anguis colchica incerta	M	NO	-	-	YES
46	NMP-P6V 34246	Anguis colchica Pontic	F	NO	-	-	YES
46	NMP-P6V 33481	Anguis colchica Pontic	M	NO	-	-	YES
47	NMP-P6V 74967	Grey zone specimen	F	NO	-	-	YES
47	NMP-P6V 7233	Grey zone specimen	M	NO	-	-	YES
47	NMP-P6V 7109	Grey zone specimen	M	NO	-	-	YES
48	NMP-P6V 32387	Anguis fragilis	F	NO	-	-	YES
48	NMP-P6V 34275	Anguis fragilis	M	NO	-	-	YES
49	NMP-P6V 75200	Anguis fragilis	M	NO	-	-	YES
50	NMP-P6V 74439	Anguis fragilis	F	NO	-	-	YES
51	NMP-P6V 35061-1	Anguis fragilis	F	NO	-	-	YES
51	NMP-P6V 35061-2	Anguis fragilis	F	NO	-	-	YES
52	NMP-P6V 72730	Anguis fragilis	F	NO	-	-	YES
53	NMP-P6V 74408	Anguis fragilis	F	NO	-	-	YES
54	NMP-P6V 74471	Anguis fragilis	F	NO	-	-	YES
55	NMP-P6V 35096	Anguis fragilis	M	NO	-	-	YES
56	NMP-P6V 73650-1	Anguis fragilis	F	NO	-	-	YES
56	NMP-P6V 73650-2	Anguis fragilis	M	NO	-	-	YES
57	NMP-P6V 35057	Anguis fragilis	F	NO	-	-	YES
57	NMP-P6V 32640	Anguis fragilis	F	NO	-	-	YES
58	NMP-P6V 35090	Anguis fragilis	M	NO	-	-	YES
59	NMP-P6V 74127	Anguis fragilis	M	NO	-	-	YES
60	NMP-P6V 71317	Anguis fragilis	F	NO	-	-	YES
61	NMP-P6V 35059	Anguis fragilis	F	NO	-	-	YES
62	NMP-P6V 35411/2	Anguis fragilis	M	NO	-	-	YES
62	NMP-P6V 35411/1	Anguis fragilis	F	NO	-	-	YES
63	NMP-P6V 75663/1	Anguis fragilis	F	NO	-	-	YES
63	NMP-P6V 75663/2	Anguis fragilis	F	NO	-	-	YES
64	NMP-P6V 33728	Anguis fragilis	F	NO	-	-	YES
65	NMP-P6V 75488	Anguis fragilis	F	NO	-	-	YES
66	NMP-P6V 35067	Anguis fragilis	M	NO	-	-	YES
67	NMP-P6V 73611	Anguis fragilis	F	NO	-	-	YES
68	NMP-P6V 75517	Anguis fragilis	F	NO	-	-	YES
68	NMP-P6V 74407	Anguis fragilis	M	NO	-	-	YES
68	NMP-P6V 74990	Anguis fragilis	M	NO	-	-	YES
68	NMP-P6V 32388	Anguis fragilis	M	NO	-	-	YES
68	NMP-P6V 74543	Anguis fragilis	F	NO	-	-	YES
68	NMP-P6V 33415	Anguis fragilis	M	NO	-	-	YES
68	NMP-P6V 35089/3	Anguis fragilis	M	NO	-	-	YES
69	NMP-P6V 73138	Anguis fragilis	M	NO	-	-	YES
70	NMP-P6V 73066	Anguis fragilis	F	NO	-	-	YES
71	NMP-P6V 35085	Anguis fragilis	M	NO	-	-	YES
72	MNP6V 75133	Anguis fragilis	F	NO	-	-	YES
72	NMP-P6V 73926	Anguis fragilis	M	NO	-	-	YES
73	NMP-P6V 31747	Anguis fragilis	F	NO	-	-	YES
74	NMP-P6V 72629	Anguis fragilis	M	NO	-	-	YES
75	NMP-P6V 70419	Anguis fragilis	F	NO	-	-	YES
76	NMP-P6V 74875	Anguis fragilis	F	NO	-	-	YES
77	NMP-P6V 74126	Anguis fragilis	F	NO	-	-	YES
78	NMP-P6V 71781	Anguis fragilis	M	NO	-	-	YES
79	NMP-P6V 31513	Anguis fragilis	F	NO	-	-	YES
80	NMP-P6V 75606	Anguis fragilis	M	NO	-	-	YES
81	NMP-P6V 74410	Anguis fragilis	F	NO	-	-	YES
82	NMP-P6V 35100	Anguis fragilis	F	NO	-	-	YES
83	NMP-P6V 75111	Anguis fragilis	M	NO	-	-	YES
84	NMP-P6V 74406	Anguis fragilis	M	NO	-	-	YES
85	NMP-P6V 70642	Anguis colchica incerta	F	NO	-	-	YES
86	NMP-P6V 74469	Anguis colchica incerta	M	NO	-	-	YES
86	NMP-P6V 74468	Anguis colchica incerta	M	NO	-	-	YES
87	NMP-P6V 73238	Anguis colchica incerta	M	NO	-	-	YES
88	NMP-P6V 73124	Anguis colchica incerta	M	NO	-	-	YES
89	NMP-P6V 32368-1	Anguis colchica incerta	F	NO	-	-	YES
89	NMP-P6V 32368-2	Anguis colchica incerta	F	NO	-	-	YES
90	NMP-P6V 74411	Anguis colchica incerta	M	NO	-	-	YES
91	NMP-P6V 70591	Anguis colchica incerta	M	NO	-	-	YES
91	NMP-P6V 7415-3	Anguis colchica incerta	M	NO	-	-	YES
91	NMP-P6V 7415-2	Anguis colchica incerta	F	NO	-	-	YES
91	NMP-P6V 7415-1	Anguis colchica incerta	M	NO	-	-	YES
91	NMP-P6V 7419/1	Anguis colchica incerta	M	NO	-	-	YES
91	NMP-P6V 7419/2	Anguis colchica incerta	F	NO	-	-	YES
91	NMP-P6V 74153	Anguis colchica incerta	M	NO	-	-	YES
91	NMP-P6V 74103-2	Anguis colchica incerta	M	NO	-	-	YES
91	NMP-P6V 74103-1	Anguis colchica incerta	M	NO	-	-	YES
91	NMP-P6V 72822	Anguis colchica incerta	M	NO	-	-	YES
91	NMP-P6V 74132-2	Anguis colchica incerta	M	NO	-	-	YES
91	NMP-P6V 74132-3	Anguis colchica incerta	F	NO	-	-	YES
91	NMP-P6V 74132-1	Anguis colchica incerta	M	NO	-	-	YES
91	NMP-P6V 74121-1	Anguis colchica incerta	M	NO	-	-	YES
91	NMP-P6V 74121-2	Anguis colchica incerta	M	NO	-	-	YES
92	NMP-P6V 75373	Grey zone specimen	M	NO	-	-	YES
93	NMP-P6V 74467	Grey zone specimen	F	NO	-	-	YES
94	NMP-P6V 75343	Grey zone specimen	M	NO	-	-	YES
95	NMP-P6V 73586	Grey zone specimen	M	NO	-	-	YES
96	NMP-P6V 72435	Grey zone specimen	M	NO	-	-	YES
97	NMP-P6V 35095	Grey zone specimen	F	NO	-	-	YES
98	NMP-P6V 74426	Grey zone specimen	M	NO	-	-	YES
99	NMP-P6V 74466	Grey zone specimen	F	NO	-	-	YES
100	NMP-P6V 74409	Grey zone specimen	F	NO	-	-	YES
101	NMP-P6V 74759	Grey zone specimen	M	NO	-	-	YES
102	NMP-P6V 33708	Grey zone specimen	F	NO	-	-	YES
103	NMP-P6V 71413	Grey zone specimen	M	NO	-	-	YES
104	NMP-P6V 70057	Anguis colchica orientalis	F	NO	-	-	YES
105	NMP-P6V 72678	Anguis colchica orientalis	F	NO	-	-	YES
106	NMP-P6V 72680	Anguis colchica orientalis	M	NO	-	-	YES
107	NMP-P6V 35087	Anguis colchica incerta	F	NO	-	-	YES
108	NMP-P6V 35058	Anguis colchica incerta	F	NO	-	-	YES
109	NMP-P6V 35092/5	Grey zone specimen	M	NO	-	-	YES
109	NMP-P6V 35092/4	Grey zone specimen	F	NO	-	-	YES
109	NMP-P6V 35092/3	Grey zone specimen	M	NO	-	-	YES
109	NMP-P6V 35092/6	Grey zone specimen	F	NO	-	-	YES
109	NMP-P6V 35092/2	Grey zone specimen	M	NO	-	-	YES
109	NMP-P6V 35092/1	Grey zone specimen	M	NO	-	-	YES
110	NMP-P6V 70835-1	Anguis colchica Pontic	F	NO	-	-	YES
111	NMP-P6V 73694	Anguis colchica colchica	F	NO	-	-	YES
112	AC 73509	Anguis colchica incerta	F	NO	-	-	YES
113	AC 74450	Anguis colchica incerta	F	NO	-	-	YES
114	AC 74451	Anguis colchica incerta	F	NO	-	-	YES
