# Supplementary material for: Contact zone of slow worms Anguis fragilis Linnaeus, 1758 and Anguis colchica (Nordmann, 1840) in Poland
Source: PeerJ. 2025 Jan 6;13:e18563. doi: 10.7717/peerj.18563 (PMC11716018; doi:10.7717/peerj.18563)
Supplement: Supplemental Information 17 — Code/Museum number as in Table 1, character codes and description as in Tables S1A and S2A. [file peerj-13-18563-s017.xlsx]

## Sheet: Arkusz1
Code/Museum number	Species	Sex	SVL	HW	HH1	HL2	HL3	HL1	OR_N	HH2	FW	FL	NO	SL	IL	SRC	V	EO	P	DP	HP	CT	CL	CV
PS2014_1	Anguis fragilis	F	143.33	7.47	5.11333	7.13333	3.86333	10.19	2.81	2.99	2.78333	3.03667	2.08333	9	0	25	119	0	1
DB2014_1	Anguis fragilis	M	130.67	8.02333	6.33333	6.97	4.26667	12.3933	3.49333	3.45667	2.92333	3.72667	2.48	9	9			0	1
TU2014_1	Grey zone specimen	M	125	6.71	5.02	7.6	3.78333	11.18	2.78333	3.15667	2.86	3.70667	2.45667	9	9	24	114	0	2
Lu2015_3	Anguis colchica incerta	F	207.67	10.56	8.62	11.3767	5.31333	13.97	3.99333	4.48	3.29667	4.71	3.23	9	10	27	119	3	2	4	2	3	1	3
Lu2015_4	Anguis colchica incerta	M	213.33	12.4933	9.25	13.8533	6.45667	16.84	4.47667	5.09333	4.27667	5.25	3.87333	8	9	27	126.667	3	3	2	2	2	2	3
Lu2015_5	Anguis colchica incerta	M	195	10.5567	8.16667	11.25	6.15667	15.1567	4.08	4.83333	3.70333	4.75333	3.70667	9	9	27	122.667	3	2	1	1	3	2	3
Lu2015_1	Anguis colchica incerta	M	184.67	10.1533	8.19333	9.75667		14.2667	3.64333	4.69333	4.04	4.75333	3.59667	9	10	28	125.667	3	3	3	1	3	2	3
Lu2015_2	Anguis colchica incerta	M	154.33	8.49	6.51	8.13667	3.90667	12.6967	3.54333	3.86333	3.55333	4.13	2.89	9	9	28	116	3	2	2	2	3	3	4
N2015_1	Anguis fragilis	M	177.33	11.1133	8.58333	9.38	4.40667	14.1667	3.12333	4.96667	4.1	4.43333	3.68667	9	9	25	120	0	1	1	3	1	2	2
N2015_2	Grey zone specimen	M	131.67	7.93	6.44333	8.05667	3.83	10.6433	2.90667	3.61333	3.14333	3.66667	2.69333	9	9	24	125	0	2	3	1	2	3	5
N2015_6	Anguis fragilis	M	158	10.61	8.27333	11.7133	4.76333	14.23	3.62667	4.73	4.31333	4.90667	3	9	9	26	123	0	1	1	2	2	3	2
N2015_4	Anguis fragilis	M	188	10.44	7.65667	11.1233	5.46667	14.1767	4.14	4.40333	3.96667	4.26667	3.42333	9	9	25	128.667	0	1	1	2	1	2	2
N2015_7	Anguis fragilis	M	168	11.31	7.98667	9.69333	5.03333	13.7967	3.57	4.52667	3.88667	4.30667	3.33	9	10	25	122.333	0	1	1	2	2	2	2
N2015_5	Anguis fragilis	M	123.33	8.22667	6.55667	6.62667	4.08	10.3933	2.82	3.11667	3.25333	2.59333	2.31333	9	9	25	124.333	0	2	4	1	3	1	3
N2015_3	Anguis fragilis	M	164	8.02333	7.23	10.16	4.62	12.39	3.69667	4.46	3.92333	3.89667	3.21	9	9	25	128.333	0	2	3	2	2	2	3
KG2015_4	Anguis fragilis	F	160	7.99667	6.32667	8.45333	4.35	11.3233	3.34333	3.66333	3.43333	3.50667	2.91667	9	9	24	121.667	0	1	4	1	3	1	3
KG2015_5	Anguis fragilis	F	163.33	7.81333	6.43333	7.56333	4.47333	11.6	3.17333	3.98	3.36333	3.91333	2.33667	9	9	24	117	0	1	3	1	3	1	3
KG2015_6	Anguis fragilis	F	155	7.57667	6.70333	7.44	3.73667	11.1867	3.11	3.83667	3.08667	3.42667	2.54	9	9	25	125.333	0	1	3	1	3	2	3
KG2015_1	Anguis fragilis	M	122	7.44333	5.58333	7.15	3.60333	10.32	2.54333	3.49667	3.51	3.32	2.45667	8	8	24	111.667	0	1	3	2	1	2	2
KG2015_2	Anguis fragilis	M	179	8.98667	7.16	9.82667	4.77667	12.9733	3.72667	4.20333	4.01667	3.98333	3.16667	9	9	25	121	0	2	3	2	1	2	1
PL2015_2	Anguis fragilis	F	157	9.00667	7.08	7.91333	4.83	13.0533	3.70333	4.05333	3.83667	3.98667	2.99	9	8	25	127	0	1	3	2	1	2	2
PL2015_3	Anguis fragilis	M	188.67	8.34667	6.96667	8.60667	5.33667	14.2267	3.65333	4.19333	3.51667	4.69333		0	0	25	129.667	0	1	3	2	1	2	1
Ba2015_2	Anguis fragilis	F	177.33	10.3	7.68333	10.29	5.38667	15.14	3.98333	4.70333	4.46333	4.35333	3.42	9	9	24	111.333	0	1	2	2	1	2	1
Ba2015_4	Grey zone specimen	F	163.33	8.12	6.50667	7.79333	4.38333	12.7867	3.53333	3.81667	3.36667	3.83333	2.59	9	9	25	124.333	0	1	2	2	3	3	3
Ba2015_1	Grey zone specimen	M	216.67	13.4733	9.61667	14.15	6.48	17.3133	4.50667	5.38	5.04	5.79	4.04	10	10	26	128.667	0	2	1	2	1	2	1
Ba2015_3	Anguis fragilis	F	174	8.22	6.93333	8.78667	4.38	12.6433	3.31	3.83333	3.31	4.1	2.79	8	9	24	123.667	0	1	3	1	3	3	3
Ba2015_5	Grey zone specimen	M	162.67	7.45	6.36333	8.02	4.49667	11.7233	3.33667	3.64	3.34	3.67667	2.53	9	9	24	116.667	0	2	3	1	3	1	3
ST2016_1	Anguis colchica incerta	M	147.67	9.74	7.15	8.95	4.58667	12.8467	3.43333	4.04667	3.68667	4.44	2.95	9	9	27	129.333	3	2	3	2	1	2	1
KY2015_1	Anguis colchica incerta	M	246.67	12.3967	9.08333	13.3933	6.77333	18.4933	4.64667	5.51667	5.36	5.83	4.07667	9	9	28	136	3	2	1	1	1	2	2
KL2015_1	Anguis colchica incerta	F	120.67	6.48333		6.69	3.94667	10.3533	2.54333	3.01667	2.73667	3.83667	2.24	9	0	27	123.667	3	3	3	2	3	1	3
S2015_4	Anguis fragilis	M	174	11.0367	8.52	9.32	5.23667	13.9867	4.01	4.39333	4.42	5.4	3.20333	8	8	25	121.667	0	2	2	2	1	2	1
S2015_3	Anguis fragilis	M	188.33	13.17	10.5567	11.3467	6.43333	16.3767	4.31333	5.60667	4.86333	5.23	3.84	9	8	24	126.333	0	2	1	2	1	2	1
S2015_5	Anguis fragilis	M	166.33	10.2833	7.98333	9.61667	5.55667	13.8433	3.67	4.6	4.34667	5.19667	3.34667	9	9	24	124.667	0	1	3	3	1	2	1
S2015_2	Anguis fragilis	F	174.33	9.26333	6.90667	7.99333	4.32333	12.4367	3.33667	3.89	3.97	4.35	2.98667	8	9	25	122.667	0	2	4	1	3	2	1
G2015_1	Anguis fragilis	M	146.33	7.99667	6.42	8.2	4.25	11.5333	3.12333	3.73333	2.98333	3.72667		9	9	24	124	0	2	3	2	2	1	2
By2016_1	Anguis fragilis	M	166.67	10.18	7.03	10.03	5.33667	15.1867	4.03667	4.34667	3.45667	4.06	3.33333	9	9	25	131	0	1	3	2	1	2	1
By2016_2	Anguis fragilis	M	177.67	10.69	8.20333	11.3	5.35333	14.78	4.19667	5	4.17333	4.05	3.54333	9	9	25	129	0	3	2	2	1	2	1
By2016_3	Anguis fragilis	M	184	11.12	8.24	11.4433	5.89333	17.42	4.35	4.93	4.79333	4.76667	3.64667	9	9	24	130.667	0	1	1	2	1	2	1
By2016_4	Anguis fragilis	M	164.67	9.92667	7.37	8.30667	5.34333	13.9467	4.09	4.59	3.71333	3.82	2.97667	10	10	25	130.333	0	1	4	2	1	3	1
WK2015_1	Anguis fragilis	M	170.33	10.7333	7.05	8.47667	4.84	13.56	3.84	3.62	3.88667	4.08	3.16	9	10	25	128	0	1
W2015_1	Anguis fragilis	M	208.33	11.9067	8.62	13.36	5.86	16.4233	4.53667	4.74333	4.70667	5.00667	3.51667	9	10	25	128.667	0	2	1	2	1	2	1
W2015_2	Anguis fragilis	F	188.67	8.73667	6.41333	9.82667	4.73667	13.18		3.53333	4.12333	4.11667	2.45333	0	0	24		0	1	4	1	3	1	3
W2015_3	Anguis fragilis	M	173.33	8.85	6.18	9.02667	4.64333	13.0333	3.19667	3.98333	3.23	4.37333	2.49667	0	0			0	1	3	2
DB2016_1	Anguis fragilis	M	181	10.9167	8.28667	10.0233	4.63667	13.3867	4.29	4.34	3.75	4.25667	3.12333	9	9	25	129.333	0	1	3	2	1	2	1
Lb2016_2	Grey zone specimen	M	134.67	8.18667	6.28333	8.96667	4.01333	12.1467	3.22667	3.98333	3.17667	4.01333	2.47333	9	9	26	127	0	1	4	1	2	1	3
Lb2016_3	Grey zone specimen	M	154	9.62333	7.28667	9.28667	4.96	13.68	3.41333	4.41333	3.83667	4.37667	3.1	9	9	25	131.667	0	2	2	2	1	2	2
Lb2016_4	Anguis fragilis	M	156.33	10.2467	8.15	9.48	4.64667	13.6033	3.30667	4.51333	3.90667	3.83667	3.12667	9	9	26	133.333	0	2
PS2016_1 / MNHW-Reptilia-0316	Anguis fragilis	M	132.33	7.69333	6.93333	8.18	3.70333	10.7033	2.70333	3.34333	2.53667	2.96	2.40667	9	9	24	132	0	1	2	2	2	2	3
PS2016_2 / MNHW-Reptilia-0316	Anguis fragilis	F	156	7.95667	6.11667	8.55333	4.06	11.8	2.74	3.88667	3.34	3.37333	2.57	9	9	24	130	0	1	3	1	3	3	3
PS2016_3 / MNHW-Reptilia-0316	Anguis fragilis	F	142	7.12333	6.10333		4.07667	10.8567	2.62	3.48	3.21333	3.49	2.62	9	9	24	131.333	0	1	3	1	3	2	3
G2016_1	Grey zone specimen	M	204.33	9.84333	7.27	9.24	5.52333	14.86	3.93	4.66333	3.41667	4.24333	2.90667	10	9	24	136	0	1	1	1	1	2	2
G2016_2	Grey zone specimen	M	120	6.79667	5.38667	6.53667	3.72	10.31	2.63	3.39667	2.85333	3.31667	2.15333	9	9	24	124.333	0	2	4	1	2	2	1
PT2016_1	Anguis fragilis	M	159	9.42	7.09	8.13333	4.78	13.13	3.54	4.27333	3.51667	3.69	2.98667	9	9	24	128	0	1	4	1	1	2	3
PT2016_2	Anguis fragilis	F	126	7.02667	5.34667	6.48	4.16333	11.2767	2.86333	3.46667	3.21	3.28333	2.65	8	10	24	127.333	0	1	4	1	2	3	3
PT2016_3	Anguis fragilis	F	152	7.63333	6.1	7.46667	4.26333	11.8733	3.34	3.76	3.42	3.37	2.52667	9	9	26	125.667	0	1	3	1	3	1	1
RY2017_1	Anguis colchica incerta	F	148	8.39667	6.69	7.53333	4.32333	12.53	3.38333	3.89	3.16333	3.78667	2.56667	8	9	27	138.333	3	3	2	1	3	3	3
Lb2016_5	Anguis fragilis	F	165	7.49333	6.14333	7.33	4.09033	11.2033	3.36	3.74	2.75	3.35333	2.58667	9	9	25	135.333	0	1	3	1	3	3	3
Lb2016_6	Grey zone specimen	F	176	8.11	7.07	8.83667	5.42667	13.2	3.67667	4.3	3.79333	4.24	2.95667	9	9	26	131	0	1	4	1	3	1	3
J2016_1	Anguis fragilis	M	195	10.55	7.79333	10.87	5.64	15.6367	4.20667	4.94333	4.52667	4.89	3.35	9	9	26	136.667	0	2	2	1	1	2	1
KK2016_1	Grey zone specimen	M	170.33	11.3033	8.12333	9.88667	5.07	16	4.05333	5.12667	4.3	4.36667	3.33333	10	9	26	135.333	0	2	1	2	1	2	1
KK2016_2	Anguis fragilis	M	139.67	8.16333	6.55667	6.68333	4.05333	11.7833	2.92333	4.03	2.88333	3.37	3.33	9	9	25	126.667	0	1	2	1	1	3	2
M2016_1	Anguis colchica incerta	M	186.33	10.2833	8.03	9.29667	5.49	15.9733	3.82667	4.96333	3.92333	4.82	3.92	10	9	28	140	3	1	1	1	3	1	2
BO2017_1	Anguis colchica incerta	F	194	10.0833	8.06667	10.2367	5.64667	15.51	3.89	4.62333	3.88667	5.14333	2.96	9	9	27	144	3	2	3	1	3	1	3
W2016_1	Anguis fragilis	F	195.33	9.28	7.30667	7.97667	4.5	13.6867	3.42	3.84	3.66	4.10333	2.56333	9	9	24	133	0	1	2	1	3	1	3
W2016_2	Anguis fragilis	F	187.67	9.11667	6.44	7.99333	5.40667	13.5433	3.43	3.88667	3.79	4.23333	2.62333	9	9	24	135	0	1	2	1	3	1	3
GO2016_1	Anguis fragilis	M	155.67	7.26	5.80667	8.33	4.1	12.3367	2.79667	3.52	3.27	3.83667	2.48	10	9	25	128.333	0	1
KR2017_1	Anguis colchica incerta	F	123.67	6.46	4.97667	6.22	3.46	10.4667	2.43	3.09333	3.09333	3.45	2.15333	9	9	27	122	2	3	3	1	3	3	3
KR2017_2	Anguis colchica incerta	F	150	8.41667	6.38333	8.01	4.53	13.4033	3.04333	3.74667	3.42	3.96667	2.46667	9	10	27	135.333	3	3	1	2	1	2	2
KR2017_3	Anguis colchica incerta	M	152.33	7.25667	5.69333	8.80667	4.63667	12.5433	3.21	3.28	3.48333	3.99	2.03	9	9	28	123.667	3	3	2	1	3	1	3
KR2017_4	Anguis colchica incerta	F	169.67	9.71333	6.79	8.13	5.01	13.0833	3.39	3.62333	3.31333	4.04	2.56333	9	9	27	125	3	3	3	1	3	1	3
KR2017_5	Anguis colchica incerta	F	189.67	8.47	6.61	7.61667	4.26667	12.8233	3.14	3.63	3.57	3.93333	2.63	9	9	27	136.667	3	3	2	2	1	2	4
KR2017_6	Anguis colchica incerta	M	185.67	9.79667	7.42333	9.66667	4.99	14.9667	3.33333	4.01	4.27	4.79333	3.25333	9	9	27	131	3	3	1	2	1	2	2
PZ2017_1	Grey zone specimen	F	171.33	6.09333	5.62333	8.60667	3.91667	10.6		3.66333	2.55333	3.51		0	0	24	129.333	0	2	4	1	2	1	3
BL2017_1	Anguis colchica incerta	M	182.67	8.41333	7.61986	11.01	5.52	14.51	3.73667	3.87667	4.65	5.09667	2.95333	9	0	27	131	3	3	1	2	1	2	2
TG2017_1	Hybrid	M	195.33	9.93667	7.70667	9.70667	5.47	14.98	4.00667	4.26667	4.05333	4.65667	3.24333	9	9	27	131.333	3	2	1	2	3	2	2
PS2017_1 / MNHW-Reptilia-0317	Anguis fragilis	M	167.67	7.40333	5.32	7.13333	4.09	11.5967	2.66667	3.08333	3.59667	3.84	2.46	9	9	25	127.667	0	1	3	1	3	1	3
PS2017_2 / MNHW-Reptilia-0317	Anguis fragilis	F	128	5.37667	4.72333	4.95	3.2	9.60333	2.30333	2.58	2.37333	3.15	2.04	9	9	24	121.333	0	2	3	2	3	2	3
I2017_1	Anguis fragilis	M	156.67	8.09	6.24	7.71333	4.52	12.6567	3.29333	3.24333	2.85333	4.52667	2.32	10	9	25	125	0	2	4	3	1	3	1
I2017_2	Anguis fragilis	M	133	7.45333	5.72	6.78667	3.82	10.4533	2.5	3.12667	2.80333	3.25333	2.19667	9	9	24	128	0	1	3	1	1	2	1
C2017_1	Hybrid	M	214.67	12.77	9.2	10.57	5.84333	16.33	4.15	5.02333	4.86	4.91	3.41333	9	9	28	141.333	2	2	3	2	1	2	1
C2017_2	Hybrid	M	212	12.5133	9.21667	11.3467	6.15	16.6133	4.40333	4.61	4.62333	5.57333	3.58333	9	9	26	136	3	3	1	2	1	2	1
C2017_3	Hybrid	M	170.67	10.16	7.33	8.22667	4.55	12.5633	3.08333	4.31667	3.34	3.4	2.42	9	9	27	133.333	3	1	3	2	1	2	4
C2017_4	Anguis colchica incerta	F	170.33	7.62333	6.31333	7.23	3.91	11.45	2.89667	3.14667	2.91	3.68667	2.39667	9	9	28	138	2	3	3	1	1	1	3
DB2017_1	Anguis fragilis	M	163.67	8.59333	6.67333	8.14333	4.22	12.6333	2.91667	3.73	3.68667	4.13333	2.68667	10	9	25	129.333	0	2	3	1	1	2	1
DB2017_2	Anguis fragilis	F	130.33	6.43667	4.17333	6.91	3.56	9.67	2.45	2.43667	2.97333	3.15667	2.23667	9	9	25	123.667	0	2	3	1	3	1	3
Lu2017_1	Anguis colchica incerta	F	191	9.21	6.94	9.52	4.96	13.7	3.60667	3.58667	3.64	4.27667	2.97667	9	9	29	138	3	3	2	1	3	1	4
Lu2017_2	Anguis colchica incerta	F	129.67	6.41333	5.1	6.06667	3.77	10.2533	2.55333	2.83667	2.57667	3.03667	2.16333	9	9	27	126	3	2	3	1	3	1	3
Lu2017_3	Anguis colchica incerta	F	141	7.17333	5.43	6.5	3.78333	11.0133	3.07667	2.89333	3.15	3.62	2.40667	9	9	27	135.667	3	3	2	1	3	1	3
RZ2017_1	Anguis colchica incerta	F	143.33	7.88	5.74667	6.07	4.25333	11.0933	3.01333	3.1	2.67333	3.53667	2.21	9	9	28	127.667	3	3	2	1	3	1	3
KK2017_1	Hybrid	F	170.67	6.8	5.41	7.30333	4.13667	12.2633	3.17333	3.13	2.97333	3.67	2.00667	9	0	26	133	2	1	4	1	3	1	3
MNHW-Reptilia-247_1	Anguis colchica incerta	M	197.33	9.97667	7.20333	10.55	5.25333	15.3467	3.60333	3.89333	3.55667	4.88	3.14	8	9	27	141.333	3	3	1	2	3	2	2
MNHW-Reptilia-247_2	Anguis colchica incerta	M	206.67	10.8733	8.16333	11.2533	5.70667	17.7033	4.12667	4.34667	4.45333	5.80667	3.62	8	8	28	139	3	3	1	2	2	2	2
MNHW-Reptilia-247_7	Anguis colchica incerta	F	214.67	9.21	6.16333	9.72	6.49667	15.4167	3.98	3.19	4.12333	4.68	2.73	9	9	26	134.667	3	3	2	1	3	1	3
MNHW-Reptilia-247_3	Anguis colchica incerta	F	211.33	8.41333	7.03333	9.72333	5.24	14.7667	3.72667	3.98333	4.32	5.05333	2.55	9	9	28	136.667	3	2	2	1	3	1	3
MNHW-Reptilia-247_4	Anguis colchica incerta	F	206.33	7.49333	5.79	8.21	4.97	14.24	3.35	3.17333	3.63333	4.42333	2.62	9	9	28	137.333	3	2	2	1	3	1	3
MNHW-Reptilia-247_5	Anguis colchica incerta	F	243.33	9.13	7.08	9.44	5.85	15.9567	4.18667	3.64333	4.56333	5.47	3.10333	9	9	27	140.667	3	3	2	1	3	1	3
MNHW-Reptilia-247_6	Anguis colchica incerta	F	209.33	8.15333	5.68	8.45667	5.00333	14.49	3.54667	3.40333	3.73333	4.24	2.66333	0	9	27	140.333	3	3	2	1	3	1	3
U2018_1	Anguis colchica incerta	F	183.67	9.40667	7.60333	8.68667	4.79667	13.9633	3.36	4.34667	3.73667	4.39	2.48	9	9	28	138	3	3	2	2	3	1	3
CZ2017_1	Anguis colchica incerta	M	154.33	6.58667	4.98333	6.92333	4.23667	12.1333	2.67333	3.26	3.28333	3.94333	1.98667	9	9	28	132.667	3	3	1	3	1	3	3
M2017_1	Anguis colchica incerta	M	187.67	9.22667	7.12667	9.61	4.94	15.8567	3.92	3.71		5.12	2.84667	9	9	27	136.333	3	2	3	1	1	2	2
KL2017_1	Anguis colchica incerta	M	143	7.70333	5.41	6.86667	3.73333	11.7233	2.50667	2.8	3.19667	3.95	2.11333	9	9	28	133.333	3	3	1	1	2	2	3
KL2017_2	Anguis colchica incerta	M	187.33	9.50667	7.55	10.3933	5.19667	15.7233	3.78667	4.2	4.37333	5.11667	3.24667	8	9	28	139.333	3	3	1	2	1	2	1
MNHW-Reptilia-0335	Anguis fragilis	F	175.67	6.43667	6.02	6.35667	4.14	11.5333	3.09667	3.12	3.23333	3.96667	2.39333	9	9	25	131	0	1	3	1	3	1	3
MNHW-Reptilia-0318	Anguis fragilis	F	152.33	7.49	5.67667	6.49333	4.06333	10.8633	2.82333	2.90667	2.85667	3.62333	2.21667	9	9	25	131	0	1	3	1	3	1	3
MNHW-Reptilia-0280	Anguis fragilis	M	161	8.32667	6.61	8.03667	4.68	12.63	3.40333	3.49667	3.19667	3.57333	2.29333	9	9	24	129.333	0	2	3	1	2	2	2
MNHW-Reptilia-0330	Anguis fragilis	M	126.67	7.08	4.49	6.34	3.50667	10.7767	2.41667	2.64	2.88	3.18	2.16	9	9	25	131.667	0	1
MNHW-Reptilia-0334	Anguis fragilis	M	146.67	7.92333	6.30667	6.64333	3.68333	11.5	2.65	3.32333	2.88667	3.82667	2.27667	9	9	24	124.667	0	3	3	1	1	3	1
MNHW-Reptilia-0248_3	Anguis fragilis	F	172	7.01	5.9	6.66	4.33	11.6767	3.03667	3.45333	3.15333	4.16667	2.32667	9	9	24	130	0	3	3	1	3	1	3
MNHW-Reptilia-0248_1	Anguis fragilis	M	177.33	8.33333	6.64	7.26333	4.47	13.2733	3.09	3.69667	3.66667	3.80333	2.57667	9	9	24	131.333	0	1	3	2	1	2	1
MNHW-Reptilia-0248_2	Anguis fragilis	M	181.67	8.79333	6.91333	7.89333	4.80333	13.3967	3.43	4.21333	3.71	3.79333	2.84333	9	9	24	133.667	0	1
MNHW-Reptilia-0310-1	Anguis fragilis	M	170	6.49667	5.67667	6.14667	4.03667	12.28	3.05333	3.76	3.08	3.89333	2.14	9	9	25	133.333	0	1
MNHW-Reptilia-0310-2	Anguis fragilis	M	171.67	8.36	7.21667	7.95667	4.71	13.69	3.32333	3.99333	3.76333	4.70667	2.53333	9	9	25	131.667	0	2	1	2	1	2	2
MNHW-Reptilia-0310-3	Anguis fragilis	M	202.67	8.91667	7.32	9.24667	5.08	15.58	3.59	4.01333	4.50333	5.23333	2.96667	9	9	25	144.667	0	3
MNHW-Reptilia-0333	Anguis fragilis	M	225.67	12.3533	9.03	11.3867	5.9	16.96	4.06667	4.41667	4.65667	4.85333	3.50333	8	9	24	138	0	3
NMP-P6V 72629	Anguis fragilis	M	185.67	9.44667	7.35333	10.2367	5.01	14.15	3.60333	4.67667	3.46667	4.36667	3.12333	9	9	25	126.667	0	1	3	2	1	2	1
NMP-P6V 75517	Anguis fragilis	F	172.67	9.40667	6.70667	9.08667	4.10667	12.5033	3.05667	3.54	2.83	3.33667	2.55	9	9	26	126.667	0	1	2	1	3	1	3
ANMP-P6V 75111	Anguis fragilis	M	175.33	10.3133	7.16333	9.91667	5.02	13.4933	3.72	3.71	3.52667	4.04667	2.67667	9	10	25	128	0	2	2	2	1	2	1
NMP-P6V 74759	Grey zone specimen	M	170.67	9.27333	6.90667	9.28667	4.90667	12.48	3.01333	3.70667	3.67667	3.92	2.53	9	0	28	129.667	3	3	2	1	2	2	3
NMP-P6V 75373	Grey zone specimen	M	204	10.4233	8.01	10.1033	5.14667	14.7133	3.62667	4.57333	4.14	4.85333	3.14333	9	9	25	132	0	1	1	2	1	2	1
NMP-P6V 74875	Anguis fragilis	F	191.67	8.16	5.82	8.54667	4.31	12.8633	2.96333	3.51333	3.37333	4.38	2.63333	9	9	26	129.333	0	3	3	1	3	1	3
NMP-P6V 74469	Anguis colchica incerta	M	180	10.3267	7.49333	11.7067	5.14333	14.7267	4.03667	4.09333	3.72333	4.98667	3.01333	9	10	28	140	3	3	1	2	2	2	2
NMP-P6V 74127	Anguis fragilis	M	136	7.5	5.13333	6.61	3.59333	10.6033	2.28	2.6	2.88333	3.14	2.04333	10	9	26	127	0	2	3	1	3	2	3
NMP-P6V 74407	Anguis fragilis	M	154	7.83	5.75	8.04667	4.30333	11.67	3.12	3.50333	2.91	3.65667	2.51667	9	9	26		0	1	3	2	2	2	1
NMP-P6V 35085	Anguis fragilis	M	154.67	7.09	4.95667	6.46667	3.9	12.0467	3.5	2.93667	3.31	3.53	2.3	9	10	26	125.333
NMP-P6V 75488	Anguis fragilis	F	129.33	6.24	5.04333	5.82333	3.28667	9.45	2.54	2.58333	2.56	2.82	1.86667	9	9	26		0	3	2	1	3	1	3
NMP-P6V 73138	Anguis fragilis	M	173.33	8.59333	6.45	8.08667	4.28	12.66	3.47667	4.16667	3.41	3.52333	2.57333	9	9	26		0	1	3	2	2	2	2
NMP-P6V 33708	Grey zone specimen	F	187.33	8.24	6.10333	8.68	4.59333	13.2033	3.00333	3.34667	3.35333	3.61	2.67333	8	9	26	128.667	0	1	3	1	3	1	3
NMP-P6V 71781	Anguis fragilis	M	200.33	12.1633	9.51667	9.42	5.73667	15.1933	3.97333	4.56	3.75	4.80333	3.58	9	9	24	133.333	0	2	1	2	1	2	1
NMP-P6V 74408	Anguis fragilis	F	155.67	5.69333		7.5	3.91667	10.5333	2.66333	3.41	2.82	3.05667	1.88	9	10	24	127.667	0	1	3	1	3	1	3
NMP-P6V 74439	Anguis fragilis	F	139	6.16	5.16	5.96	3.89	10.54	2.77	2.81667	3.16667	2.93667	1.92667	9	9	25	129.667	0	1	2	1	2	1	2
NMP-P6V 32387	Anguis fragilis	F	186	7.77	5.28333	7.28333	3.99333	11.9	3.36333	3.22	3.33333	3.56333	2.34	10	10	24	136.333	0	1	4	1	3	1	3
NMP-P6V 70419	Anguis fragilis	F	153.33	7.07333	5.33	6.91667	3.77	11.3367	2.73	2.84	3.01667	3.79	2.04333	9	9	26	125.333	0	2	3	1	3	1	3
NMP-P6V 73066	Anguis fragilis	F	140	7.04	4.55667	6.00333	3.44667	10.8933	2.60333	2.74	2.6	3.56333	1.80333	9	9	25		0	1	3	1	3	1	3
NMP-P6V 71317	Anguis fragilis	F	191	9.88	7.62333	8.44333	4.61667	13.68	3.49333	3.32	3.59333	3.77667	2.73333	9	9	26	133.333	0	2	4	1	3	1	3
NMP-P6V 72730	Anguis fragilis	F	121.67	7.19667	4.51	5.73	3.12333	10.0633	2.36333	2	2.35667	3.34	1.62333	9	9	26	123.667	0	1	3	1	3	1	3
NMP-P6V 71413	Grey zone specimen	M	151	7.24333	4.92667	5.91	2.95	10.25	2.31333	2.62667	2.39667	2.73333	1.99	9	9	24	129	0	1	3	1	1	2	1
NMP-P6V 74990	Anguis fragilis	M	141	6.9	4.97	6.77333	3.88667	10.87	2.63333	2.95333	2.34333	3.13	2.02667	9	9	24	133.333	0	1	4	1	3	3	2
NMP-P6V 74409	Grey zone specimen	F	167	8.40667	5.62	7.99667	4.45333	11.84	2.75667	3.31	2.80667	3.74333	2.03667	9	0	28	136.333	3	3	3	1	3	1	3
NMP-P6V 35096	Anguis fragilis	M	154	7.43667	5.53	7.58	4.31667	12.7467	3.10333	3.73	3.12	3.60333	2.35333	9	9	24	133	0	1	3	2	2	3	2
NMP-P6V 35411/2	Anguis fragilis	M	139.33	6.16	4.70667	5.53667	3.72667	10.72	2.63667	2.48333	2.60667	3.12667	2.01333	8	9	24	124	0	1	3	2	2	3	2
NMP-P6V 35411/1	Anguis fragilis	F	171	7.3	5.44333	6.83333	4.04333	11.0633	2.91	2.93333	2.73667	3.4	2.11667	9	9	26	137.667	0	3	3	1	3	1	3
NMP-P6V 74466	Grey zone specimen	F	214.67	7.89667	7.00333	7.77	4.32	13.15	3.32333	3.24	3.78	4.19667	2.4	9	9	28	146	3	3	1	1	3	1	3
NMP-P6V 32388	Anguis fragilis	M	210.33	11.2567	8.18	11.36	5.72	15.4933	4.47333	5.23	3.63	5.26	3.32333	10	10	25	135.333	0	2	2	2	1	2	1
NMP-P6V 74426	Grey zone specimen	M	205.67	10.7767	7.79333	7.99333	5.28333	13.63	3.50333	3.77	3.66	4.17667	2.79	9	9	24	130	0	2	3	2	2	2	1
NMP-P6V 74471	Anguis fragilis	F	147.33	6.82667	5.84	6.53333	3.94667	10.6067	2.69667	2.88667	2.72667	3.35	2.21667	9	9	24	127	0	3	3	1	3	3	3
NMP-P6V74411	Anguis colchica incerta	M	184.67	9.37037	7.48667	9.90333	4.75667	14.3233	3.57333	3.96667	3.96	4.76	2.56333	9	9	29	138.333	3	3	1	2	1	2	2
NMP-P6V 35057	Anguis fragilis	F	167.33	7.88	5.41333	6.76333	3.98	11.53	3.01	2.64667	2.80333	3.35667	2.52333	9	9	26	136	0	1	3	1	3	1	3
NMP-P6V 74543	Anguis fragilis	F	180.67	8.46333	6.39	8.07	4.50667	12.73	3.39667	3.59	3.45667	4.14333	2.25333	0	9	24	128.667	0	1	3	1	3	2	3
NMP-P6V 34275	Anguis fragilis	M	172	8.30333	6.19333	8.07	4.31	12.0733	3.31	3.70333	3.00333	3.63667	2.55	9	9	24	128.333	0	1	3	1	2	3	1
NMP-P6V 73586	Grey zone specimen	M	180	9.06		8.48667	4.52667	13.6067	3.41	3.78	3.86333	4.06667	2.80333	9	9	25	135.333	0	2	3	1	1	2	2
NMP-P6V 75606	Anguis fragilis	M	169.33	8.86333	7.10333	8.39333	4.40667	12.88	3.18	3.42667	3.25333	3.79667	2.89	9	9	25	131.333	0	1	2	2	2	3	2
NMP-P6V 74467	Grey zone specimen	F	174.33	9.2	8.14	8.84	4.39	12.8033	2.83667	3.41	3.29667	3.89	2.49	9	9	28	133.667	3	2	3	1	3	3	3
MNP6V 75133	Anguis fragilis	F	158	6.92667	5.57333	6.54667	3.76	11.3033	2.99333	2.73333	2.73667	3.31333	2.3	9	9	24	129	0	1	3	1	3	1	3
NMP-P6V 31747	Anguis fragilis	F	156.33	6.91	5.11333	6.79333	3.67667	11.19	2.97667	2.61	3.11333	3.37333	2.21	9	9	25	127.667	0	1	4	1	3	1	3
NMP-P6V 32640	Anguis fragilis	F	131.67	6.04	4.98333	6.61333	3.68333	10.1667	2.65667	2.77	2.66333	3.34667	2.06333	9	9		128	0	1	4	1	3	1	3
NMP-P6V 35100	Anguis fragilis	F	160.67	8.71667	6.07667	7.1	3.99	11.73	2.98667	3.17	3.18333	3.36667	2.10667	9	9	25	131.667	0	1	3	1	3	1	3
NMP-P6V 31513	Anguis fragilis	F	143	6.71667	4.91667	6.27333	3.89	10.4533	2.58	3.06333	2.67667	2.85	2.17667	9	9	25	132.333	0	1	3	1	3	1	2
NMP-P6V 75343	Grey zone specimen	M	162.67	8.56	6.79	7.23333	3.98667	11.89	2.73	3.10333	3.26333	3.77333	2.40333	10	10	25	132.333	0	1	3	2	1	2	2
NMP-P6V 33728	Anguis fragilis	F	203.67	8.73	6.42	8.58	4.67333	13.1933	3.33	3.56	3.47667	3.97333	2.54	10	10	26	136.667	0	1	3	1	3	1	3
NMP-P6V 35095	Grey zone specimen	F	204.67	9.92	7.88333	9.07333	4.44667	13.83	2.95333	3.91667	3.15333	3.94	3.07667	9	10	26	135	0	1	4	1	3	1	3
NMP-P6V 74406	Anguis fragilis	M	200	10.91	7.31667	11.1267	5.18	14.2567	3.82333	3.44333	3.79333	4.48333	2.88667	9	9	24	128.667	0	1	1	2	1	2	1
NMP-P6V 75200	Anguis fragilis	M	161	7.3	6.32333	7.38333	4.29667	11.8467	3.06333	3.30333	3.36	3.76333	2.18333	9	9	26	124.667	0	1	3	1	2	2	2
NMP-P6V 75663/1	Anguis fragilis	F	200	8.39	6.20333	7.55	4.83	13.1533	3.14333	3.50333	2.84	3.89667	2.55	9	9	24	133.667	0	1	3	1	3	1	3
NMP-P6V 75663/2	Anguis fragilis	F	168.67	6.36667	4.99667	6.94667	5.21667	11.46	2.79333	2.74333	2.77333	3.51	2.37333	9	9	25	129	0	2	4	1	3	1	3
NMP-P6V 35059	Anguis fragilis	F	153.33	7.41333	4.16667	5.92333	3.16333	11	2.83667	2.62667	2.85333	2.69333	2.13333	9	9	26	131.333	0	1	3	1	3	1	3
NMP-P6V 33415	Anguis fragilis	M	181.33	9.49667	6.72333	8.66	4.49667	13.2067	3.34	4.15333	3.23333	3.70333	2.40333	9	9	26	128.667	0	3	3	2	1	2	2
NMP-P6V 74126	Anguis fragilis	F	166.67	7.57667	6.02	6.79667	3.89667	11.83	3.09667	3.57333	3.14333	2.49	2.61667	9	9	26	129.333	0	1	4	1	3	1	3
NMP-P6V 73611	Anguis fragilis	F	147.33	6.96333	5.17667	6.52	3.54333	9.81333	2.10333	3.19	2.57667	3.14333	2.47333	9	9	26	135.333	0	1	4	1	3	1	3
NMP-P6V 35090	Anguis fragilis	M	177.33	10.6867	7.37	9.21667	4.26667	12.9133	2.99667	4.35667	3.85	4.25667	2.83667	9	9	24	125.333	0	3	1	2	1	2	1
NMP-P6V 35067	Anguis fragilis	M	155	6.87667	5.35333	6.83667	3.88	11.3	2.82	3.10333	2.66333	3.28333	2.44333	9	9	24		0	1	3	1	2	3	2
NMP-P6V 73926	Anguis fragilis	M	168.67	9.866	6.93333	7.84	4.30333	12.95	2.92333	3.77667	2.97333	3.54667	2.49333	0	9	26		0	1	3	1	1	2	2
NMP-P6V 72435	Grey zone specimen	M	201	9.24667	6.37667	8.09667	4.93333	13.8133	3.53333	3.85	3.95667	4.50667	2.67	9	8	26	128.333	0	1	3	2	2	2	2
NMP-P6V 35089/3	Anguis fragilis	M	190.33	9.14	7.58667	8.62667	5.67333	14.6867	3.63333	4.11333	4.13333	4.55	2.97333	9	9	24
NMP-P6V 73650-1	Anguis fragilis	F	147.33	6.90333	5.26333	6.76333	3.82667	10.9833	2.69667	2.64	2.94667	3.53667	2.27	9	9	24	125.667	0	1	3	2	1	2	2
NMP-P6V 73650-2	Anguis fragilis	M	176	9.24667	6.18333	8.65333	4.52667	13.3033	3.19667	3.48333	3.06	4.34	2.58333	10	9	25	134.333	0	1	3	1	3	1	3
NMP-P6V 35061-1	Anguis fragilis	F	189	7.89667	6.5	7.75333	4.44667	13.1867	3.16	3.60333	3.08333	3.79333	2.24667	9	9	26	131.333	0	1	4	1	3	1	3
NMP-P6V 35061-2	Anguis fragilis	F	159.67	6.84333	5.52667	7.30667	3.50667	10.9533	2.70667	3.14333	2.29	3.81667	2.24667	9	9	25	124.333	0	3	3	1	3	1	3
NMP-P6V 74410	Anguis fragilis	F	164.33	7.69667	5.74667	7.45667	3.93333	11.27	3.05	2.99	2.90333	3.32333	2.12667	10	9	26	131.333	0	1	3	1	3	1	3
NMP-P6V 73238	Anguis colchica incerta	M	191	9.56	7.28	9.24667	5.09	15.07	3.94667	4.53	3.75	4.76667	2.67333	9	9	28	141.333	2	3	1	2	1	3	2
NMP-P6V 70591	Anguis colchica incerta	M	194.33	9.49	7.69333	9.55667	5.43667	15.57	3.79	4.057	3.83333	4.46333	2.88	9	9	28	137	3	3	1	1	1	2	3
NMP-P6V 7415-3	Anguis colchica incerta	M	196	9.51	7.85667	9.42333	5.31333	15.0567	3.74667	3.94333	3.77667	4.73333	2.58333	10	10	28	136.667	1	3	1	1	1	2	3
NMP-P6V 7415-2	Anguis colchica incerta	F	223.67	9.41333	7.16667	9.71	5.71667	15.1767	3.82	4.10667	3.65	4.32	2.49333	9	9	29	132	3	2	1	1	3	1	2
NMP-P6V 7415-1	Anguis colchica incerta	M	188	9.39	7.19333	9.18333	5.27667	15.3933	3.69333	3.99333	3.81333	4.73333	2.92	9	9	28	136	1	3	1	1	1	2	3
NMP-P6V 7419/1	Anguis colchica incerta	M	244	12.1267	8.96	12.1467	6.57667	17.8267	4.61667	4.75333	4.6	5.54	3.64	9	9	28	137.333	2	3	1	1	1	2	2
NMP-P6V 7419/2	Anguis colchica incerta	F	189.33	8.27667	5.72	8.53667	4.71667	13.53	3.25667	2.92	2.70333	3.98333	2.47333	9	10	28	135.333	3	3	3	1	3	1	3
NMP-P6V 73124	Anguis colchica incerta	M	227.67	11.2933	8.29	11.7233	6.03333	16.78	4.26333	5.09667	3.78333	5.29667	3.6	8	9	27		3	3	1	1	3	2	2
NMP-P6V 70642	Anguis colchica incerta	F	217.33	10.3167	7.76333	10.7	5.66333	15.59	4.36333	3.70667	3.51	4.50667	2.58333	9	9	28	138.333	3	3	3	1	3	1	3
NMP-P6V 74153	Anguis colchica incerta	M	213.67	10.6667	8.41	11.6033	6.31667	17.1267	4.39333	4.65333	4.15	5.01667	3.68	9	9	28	129	2	3	1	1	1	2	3
NMP-P6V 74103-2	Anguis colchica incerta	M	165.67	8.15	6.50333	9.01	4.75333	13.79	3.32667	3.8	3.98667	4.58	2.61333	9	9	29		3	3	1	2	1	2	2
NMP-P6V 74103-1	Anguis colchica incerta	M	223.33	12.9467	9.49333	12.4167	6.76	17.46	4.44667	5.48667	4.47667	5.30333	3.09667	9	9	29	132	3	3	1	2	1	2	1
NMP-P6V 72822	Anguis colchica incerta	M	197	11.2833	7.80333	9.98667	5.57	15.2067	3.95333	4.56333	4.11	4.64	3.13	9	9	29	137.333	3	3	1	2	1	2	1
NMP-P6V 74132-2	Anguis colchica incerta	M	243.33	11.4467	8.23667	12.2033	7.04	19.3467	4.64333	4.61	4.6	5.76	3.84	9	9	28	135.667	3	3	1	1	1	2	2
NMP-P6V 74132-3	Anguis colchica incerta	F	218.67	10.2533	7.24	9.80667	4.73333	15.6367	3.75333	3.76667	3.60667	4.7	2.90333	10	9	30	138	3	2	1	2	3	1	3
NMP-P6V 74132-1	Anguis colchica incerta	M	179.67	9.97333	7.43333	10.0833	5.25667	14.9533	3.56	3.88333	3.62667	4.42333	2.73333	9	9	28	135.333	3	3	1	1	1	2	3
NMP-P6V 74121-1	Anguis colchica incerta	M	225.33	11.9733	8.69	11.7133	6.04333	17.7233	4.63333	5.05333	4.87333	5.79	3.72333	9	9	28	133.333	1	1	1	2	1	2	2
NMP-P6V 74121-2	Anguis colchica incerta	M	179.33	9.78667	7.51	9.58	5.36	15.8667	3.96	3.48333	4.24667	4.71	3.47333	9	8	28	133.667	3	3	1	2	1	2	3
NMP-P6V 74468	Anguis colchica incerta	M	146.33	7.7	5.29	7.48667	3.91333	12.8633	3.40333	2.68	2.76333	3.57333	2.38667	9	9	28	136.667	2	3	3	2	2	3	3
NMP-P6V 35058	Anguis colchica incerta	F	250	11.39	8.03333	10.55	6.25333	16.84	4.32667	4.29667	3.93	5.03	3.53	9	9	30	140.667	3	3	1	1	3	2	3
NMP-P6V 32368-1	Anguis colchica incerta	F	214.33	9.25667	7.46333	9.35333	5.43333	15.06	3.79333	4.09	3.65667	4.87333	3.30667	10	9	28	142	1	3	2	1	3	1	3
NMP-P6V 32368-2	Anguis colchica incerta	F	240.67	10.96	8.12333	10.8333	5.67	16.4033	3.79667	4.19333	3.87	4.60667	3.15667	9	9	29	143.667	3	3	1	1	3	1	3
NMP-P6V 35087	Anguis colchica incerta	F	169.33	7.59667	5.91	7.37333	4.63	12.4833	2.92	3.59333	2.82	4.11667	2.28333	9	9	28		3	3
NMP-P6V 75362-3	Anguis colchica orientalis	F	159.33	7.23	5.34667	7.38	4.13333	12.3867	3.08333	2.87333	2.77	3.71	2.32667	8	9	28	131.333	3	3	2	2	2	1	1
NMP-P6V 75362-2	Anguis colchica orientalis	F	190	8.38333	7.12667	9.63667	4.86667	14.09	3.57333	3.17333	2.79667	4.41333	2.37333	9	8	28	133.667	3	3	3	1	3	2	3
NMP-P6V 75362-1	Anguis colchica orientalis	M	192.33	10.5033	7.63667	10.1667	6.08	16.0567	4.28667	4.23333	3.68	5.13667	3.22667	9	10	27	134.667	2	3	3	2	1	2	1
NMP-P6V 35097	Anguis colchica incerta	M	229.33	9.93	7.57667	9.55	5.99667	17.2033	4.19667	4.66667	3.79333	5.67333	3.32667	9	9	28	129	3	3	1	2	1	2	1
NMP-P6V 34246	Anguis colchica Pontic	F	258.33	12.4567	8.91	11.5533	6.37667	17.7933	4.69667	5.43667	4.39	4.63667	3.47	9	9	27	137	3	3	1	1	3	2	3
NMP-P6V 33481	Anguis colchica Pontic	M	169	7.43	5.37333	8.35	4.4	13.71	3.09333	3.39667	2.83333	4.32667	2.47333	9	9	27	131.333	3	3	3	2	2	3	2
NMP-P6V 74967	Grey zone specimen	F	207	9.24	7.43	9.42667	5.15333	14.3	3.69	4.16333	3.40333	3.78667	2.39	10	9	26		0	3	3	1	3	1	3
NMP-P6V 7233	Grey zone specimen	M	183	8.26333	6.23	7.69667	4.35667	13.3467	2.86667	3.85667	3.19	4.99	2.57	9	9	26	134.667	0	3	3	2	2	2	2
NMP-P6V 7109	Grey zone specimen	M	173.67	8.87333	6.92333	8.69333	5.40667	14.5533	3.49	3.94	3.11333	3.78667	2.36	10	9	26	121	0	1	2	2	2	2	1
NMP-P6V 35082	Anguis fragilis	M	201.67	9.19667	6.53667	9.89333	5.12333	13.18	3.52	3.78333	3.56	4.61667	2.85333	9	9	26	136.667	0	3		1	2	1	2
NMP-P6V 34009/3	Anguis fragilis	F	154	6.30333	4.86	5.77	3.37	10.7267	2.62	2.49333	2.80667	3.33667	2.11333	9	9	25	137.333	0	2	3	1	3	1	3
NMP-P6V 34009/1	Anguis fragilis	F	202	8.32667	5.87	7.37333	4.67	14.3533	3.29	3.67667	3.56667	4.44667	2.87667	9	9	26	133.333	0	2	4	1	2	1	3
NMP-P6V 34009/2	Anguis fragilis	M	183.67	9.24333	7.32667	7.80333	4.58	14.1033	3.44	3.52333	3.07667	3.95333	2.82	9	9	25	135	0	1		1	2	2	1
NMP-P6V 35092/5	Grey zone specimen	M	171.33	9.57	7.37667	9.16667	5.27	14.1133	3.65667	3.77667	3.02667	4.04667	3.29	10	10	28	135	3	3
NMP-P6V 35092/4	Grey zone specimen	F	204	8.95	6.23	8.76333	4.78	14.31	3.50333	3.88	3.82667	3.90667	2.87333	10	9	25	139	0	1
NMP-P6V 35092/3	Grey zone specimen	M	219.67	10.6533	7.84	11.11	5.86	15.7667	3.91667	4.17333	3.87333	4.45	3.23333	9	9	26	138	0	1
NMP-P6V 35092/6	Grey zone specimen	F	200.33	9.35	6.74667	8.79	5.05667	14.33	3.49667	3.61333	2.94667	3.88667	2.46	9	10	24	128.333	0	1
NMP-P6V 35092/2	Grey zone specimen	M	238.67	12.6333	7.94333	10.3067	6.44667	17.8667	4.71333	5.14333	3.74	5.09667	3.76667	10	8	24	132.333	0	3
NMP-P6V 35092/1	Grey zone specimen	M	244	11.7333	8.87333	11.4433	6.04	17.0633	4.37333	4.04667	4.20667	4.48	3.36667	9	9	24	137	0	1
NMP-P6V 73694	Anguis colchica colchica	F	247	11.9733	9.29	12.03	6.40333	17.4933	4.98333	4.70667	4.16667	5.87667	3.11	10	9	29	134.667	3	3	4	1	1	1	3
NMP-P6V 70835-1	Anguis colchica Pontic	F	168.67	7.78333	6.45333	8.59333	4.88333	13.1433	3.28667	3.47	2.78667	3.88667	2.65667	10	9	29	129	3	3	3	1	3	1	2
NMP-P6V 72678	Anguis colchica orientalis	F	152.67	7.73333	5.89333	7.27333	4.56	12.6367	3.32	3.31	2.86667	3.96	2.74333	9	9	31	128	3	3	3	2	2	1	2
NMP-P6V 70057	Anguis colchica orientalis	F	177.33	8.68667	6.62667	7.85333	4.91	13.1733	3.41	3.44333	2.79667	4.37	2.38	8	9	28	133.333	3	3
NMP-P6V 72680	Anguis colchica orientalis	M	187.67	10.0333	7.05667	10.23	5.27333	14.6367	3.50333	3.7	2.97333	4.62667	2.72667	9	9	28	134	3	3	1
AF 73628	Grey zone specimen	M	149	7.27333	5.37333	6.66667	4.08	11.2633	2.69	2.64	2.87	3.65333	2.47333	9	9	25	133.333	0	3
AC 73505	Anguis colchica incerta	F	204.33	9.12333		9.43333	5.12667	14.4933	3.91667	4.00333	3.08333	4.00667	2.66667	9	9	28	142.333	3	3	3	2	3	1	4
AC 73506	Anguis colchica incerta	M	199.67	9.59333	7.62667	10.75	5.37333	15.66	3.77667	4.2	3.56333	4.11	3.18667	10	9	28	136.667	3	2	1	2	1	2	2
AC 74450	Anguis colchica incerta	F	143	6.93667	6.05333	7.20667	4.02667	10.65	2.77	2.90667	3.03333	3.39667	2.50333	9	9	28	130.333	3	3	4	1	3	1	3
AC 74451	Anguis colchica incerta	F	157	8.19667	6.66	8.24333	4.51333	12.18	3.12333	3.16333	3.03	3.46	2.30333	9	9	28	136	3	1	4	1	3	2	3
AC 73509	Anguis colchica incerta	F	208.67	10.6467	7.53667	10.2333	5.62667	14.8133	3.49	4.21667	3.83667	4.48667	2.90667	10	9	27	137.333	3	3	3	2	3	2	3
AF 73520	Grey zone specimen	F	157.67	6.55667	5.13667	6.18333	4.26667	10.6767	2.54333	3.44333	2.30333	3.07	2.16333	9	9	25	131.333	0	1
CZ2019_2	Anguis colchica incerta	M	164.33	8.94	6.27667	8.86	4.73333	12.69	3.01667	3.65667	3.3	4.10333	2.61	9	9	28	135.333	3	2	3	2	2	1	3
RYC2017_1	Anguis colchica incerta	M	153	8.21		8.3	4.57	12.7367	2.86	3.67667	3.44333	4.44	2.16333	9	9	29	135	1	2	3	2	1	3	2
UJ2017_2	Anguis colchica incerta	F	158.67	8.43	5.74	8.66	4.38333	11.96	2.99667	3.29	3	3.72667	2.33	9	9	28	138	3	3	3	1	3	2	3
UJ2017_1	Anguis colchica incerta	M	154.67	7.67433	7.49667	8.80333	4.86	13.16	2.54333	3.73	3.30333	3.87667	2.11	9	9	28	137	1	3	1	2	2	3	2
RYC2017_2	Anguis colchica incerta	F	133	5.80333	4.71667	6.91333	4.2	10.6933	2.68333	2.86667	2.78	3.79	2.07	9	9	27	138	3	3	1	1	3	3	2
